# Supplementary material
Source: PubMed Central journal article supplement (PMC6439644)
Supplement: jamainternmed-179-167-s002.pdf [file jamainternmed-179-167-s002.pdf]

## **Data Sharing Statement**

Vidrine. Efficacy of Mobile Phone–Delivered Smoking Cessation Interventions for Socioeconomically Disadvantaged Individuals. *JAMA Intern Med*. Published December 17, 2018.  
10.1001/jamainternmed.2018.5713

### **Data**

**Data available:** No
